# Supplementary material
Source: MDPI journal article supplement (https://www.mdpi.com/2073-4344/10/1/69)
Supplement: s1 [file s1]

Supporting Information

# Doping of Chlorine from a Neoprene Adhesive Enhances Degradation Efficiency of Dyes by Structured TiO<sub>2</sub>-Coated Photocatalytic Fabrics

Zhen Cao <sup>1,†</sup>, Tingting Zhang <sup>1,†</sup>, Pin Ren <sup>1</sup>, Ding Cao <sup>1</sup>, Yanjun Lin <sup>1</sup>, Bing Zhang <sup>2</sup> and Xu Xiang <sup>1,\*</sup>

<sup>1</sup> State Key Laboratory of Chemical Resource Engineering, Beijing University of Chemical Technology, Beijing 100029, People's Republic of China

<sup>2</sup> School of Chemical Engineering, Zhengzhou University, 100 Science Avenue, Zhengzhou 450001, People's Republic of China

\* Correspondence: [xiangxu@mail.buct.edu.cn](mailto:xiangxu@mail.buct.edu.cn).

**Supplemental experimental details:**

The fabric Flumes, which is a mixture of glass fiber and P84. It is a composite with high temperature resistance, corrosion resistance, acid and alkali resistance, folding resistance and wear resistance. The felt layer is more compact, and the intertwining between the fibers is strengthened. The P84 fiber of the Flumes filter bag has a three-leaf cross-section, which forms a high surface area has the potential ability of dust collection.

Basic data:

Material: Alkali-free glass fiber / P84

Gram weight:  $> 950\text{g} / \text{m}^2$

Thickness: 2.4-3.0mm

Air permeability:  $8\text{-}15\text{m}^3 / \text{m}^2 \cdot \text{min}$

Warp tension:  $> 2100\text{N} / 5 \times 20\text{cm}$

Weft tension:  $> 2200\text{N} / 5 \times 20\text{cm}$

Warp elongation:  $< 10\%$

Weft elongation:  $< 10\%$

Operating temperature:  $\leq 260\text{ }^\circ\text{C}$

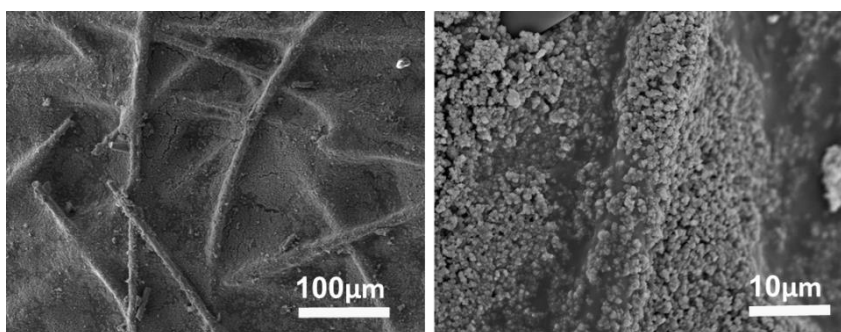

**Figure S1.** SEM images of the surface of coated fabric after multiple-cycle tests.
